# Supplementary material
Source: PubMed Central journal article supplement (PMC8176982)
Supplement: ONCO-26-e954-s001.pdf [file ONCO-26-e954-s001.pdf]

Supplemental Figures for  
Proton pump inhibitor use and the efficacy of chemotherapy in metastatic colorectal cancer: a post hoc analysis  
of a randomized phase 3 trial (AXEPT)  
Sun Young Kim et al.

**Figure S1. Overall survival (A) and progression-free survival (B) according to PPI use in the FOLFIRI arm**

FOLFIRI=leucovorin, fluorouracil, and irinotecan. PPI=proton pump inhibitor.

A.

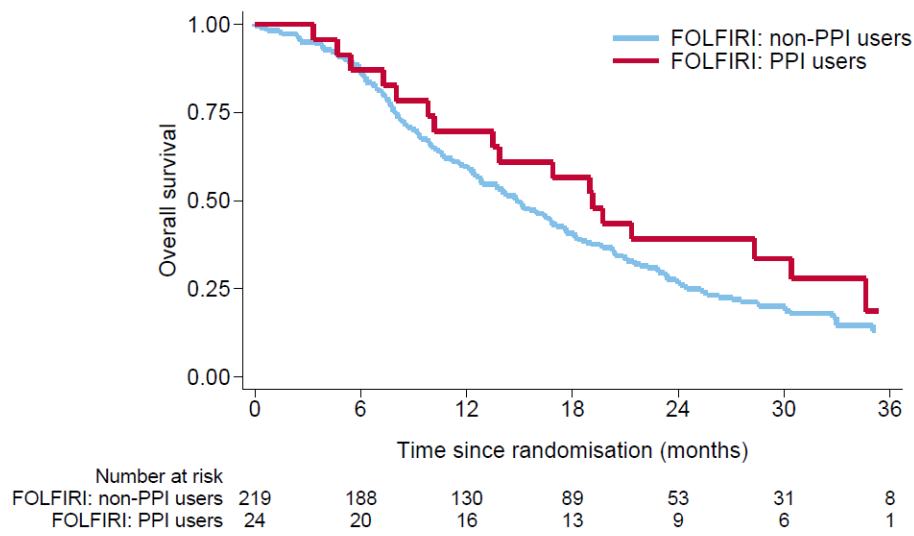

B.

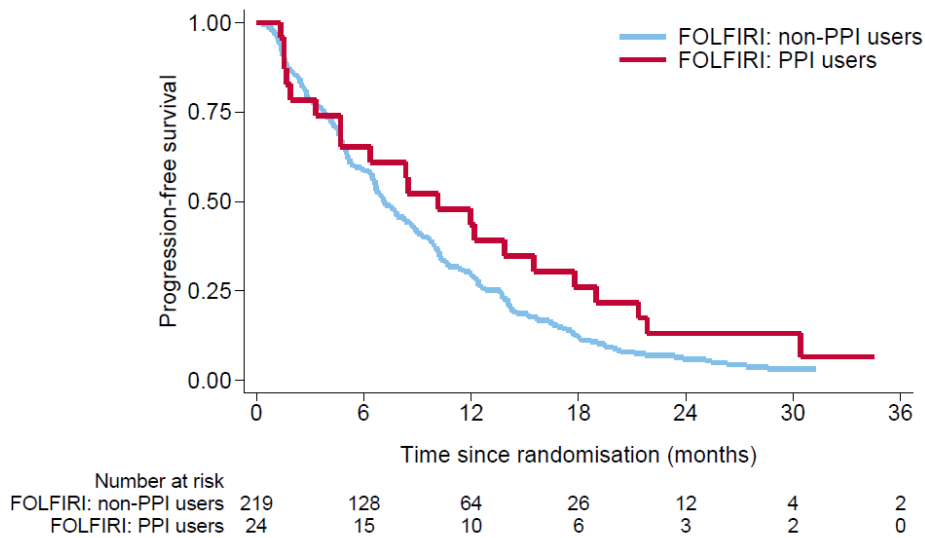

Supplemental Figures for  
Proton pump inhibitor use and the efficacy of chemotherapy in metastatic colorectal cancer: a post hoc analysis  
of a randomized phase 3 trial (AXEPT)  
Sun Young Kim et al.

**Figure S2. Overall survival (A) and progression-free survival (B) according to PPI use in the mXELIRI arm**

mXELIRI=modified capecitabine plus irinotecan. PPI=proton pump inhibitor.

A.

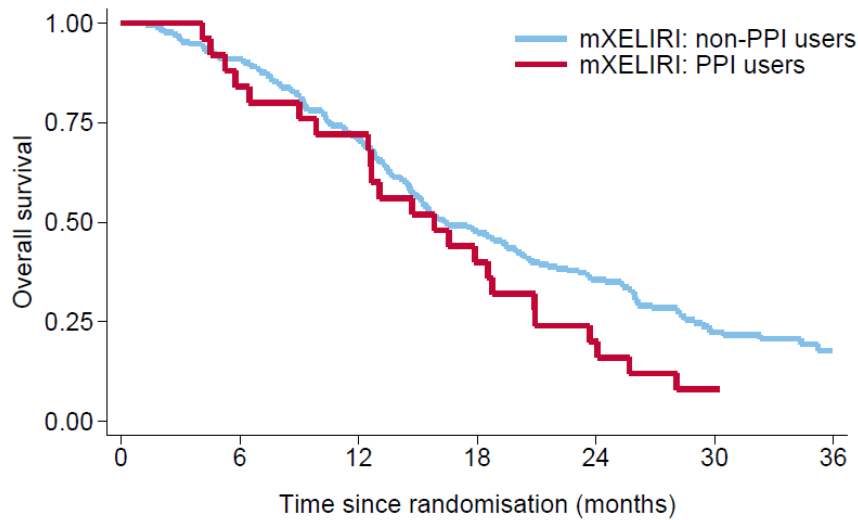

|                        | Number at risk |     |     |    |    |    |    |
|------------------------|----------------|-----|-----|----|----|----|----|
|                        | 0              | 6   | 12  | 18 | 24 | 30 | 36 |
| mXELIRI: non-PPI users | 214            | 191 | 147 | 99 | 62 | 29 | 9  |
| mXELIRI: PPI users     | 25             | 21  | 18  | 10 | 5  | 1  | 0  |

B.

Supplemental Figures for  
Proton pump inhibitor use and the efficacy of chemotherapy in metastatic colorectal cancer: a post hoc analysis  
of a randomized phase 3 trial (AXEPT)  
Sun Young Kim et al.

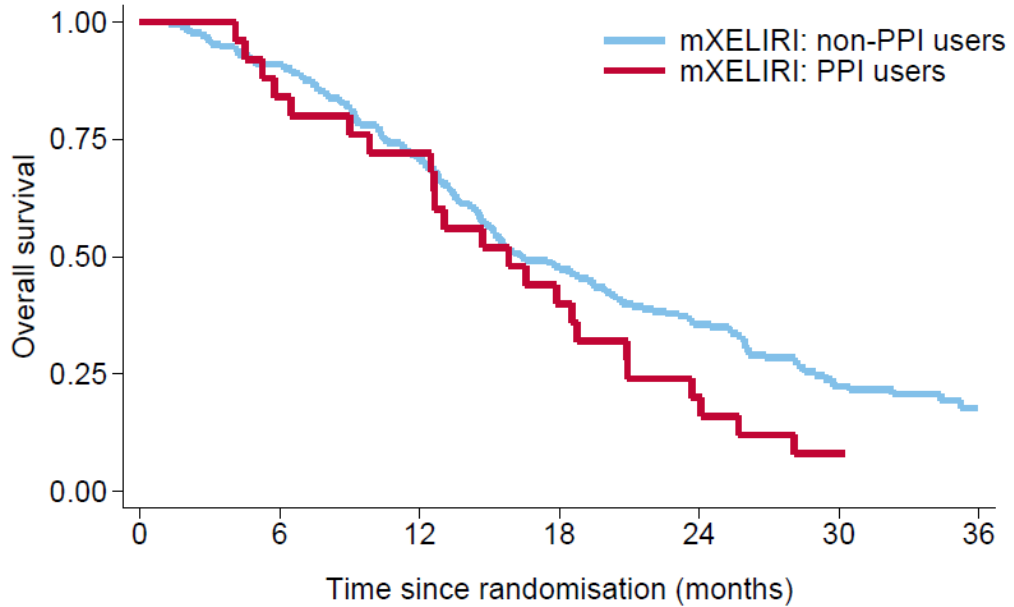

|                        | 0   | 6   | 12  | 18 | 24 | 30 | 36 |
|------------------------|-----|-----|-----|----|----|----|----|
| Number at risk         |     |     |     |    |    |    |    |
| mXELIRI: non-PPI users | 214 | 191 | 147 | 99 | 62 | 29 | 9  |
| mXELIRI: PPI users     | 25  | 21  | 18  | 10 | 5  | 1  | 0  |

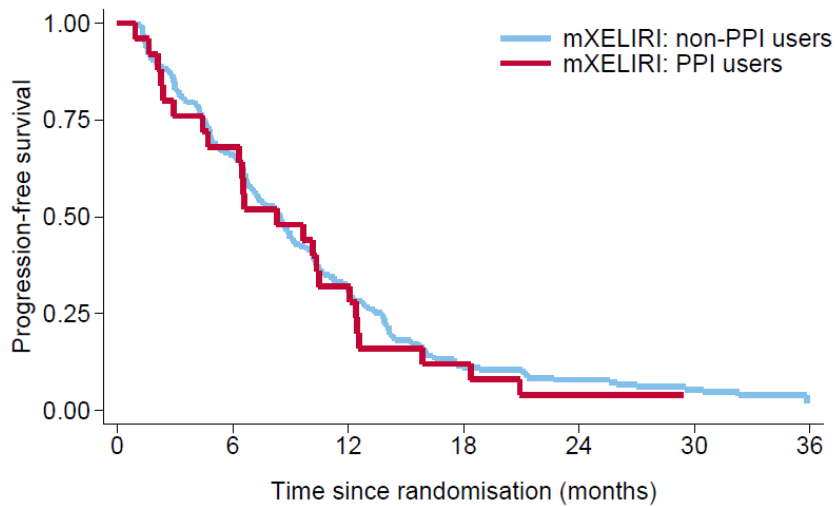

|                        | 0   | 6   | 12 | 18 | 24 | 30 | 36 |
|------------------------|-----|-----|----|----|----|----|----|
| Number at risk         |     |     |    |    |    |    |    |
| mXELIRI: non-PPI users | 214 | 135 | 63 | 21 | 13 | 8  | 1  |
| mXELIRI: PPI users     | 25  | 17  | 8  | 3  | 1  | 0  | 0  |
